# Supplementary material for: Potentiality of multiple modalities for single-cell analyses to evaluate the tumor microenvironment in clinical specimens
Source: PubMed Central journal article supplement (PMC7801605; doi:10.1038/s41598-020-79385-w), 2021-01-11
Supplement: 41598_2020_79385_MOESM5_ESM.pdf [file 41598_2020_79385_MOESM5_ESM.pdf]

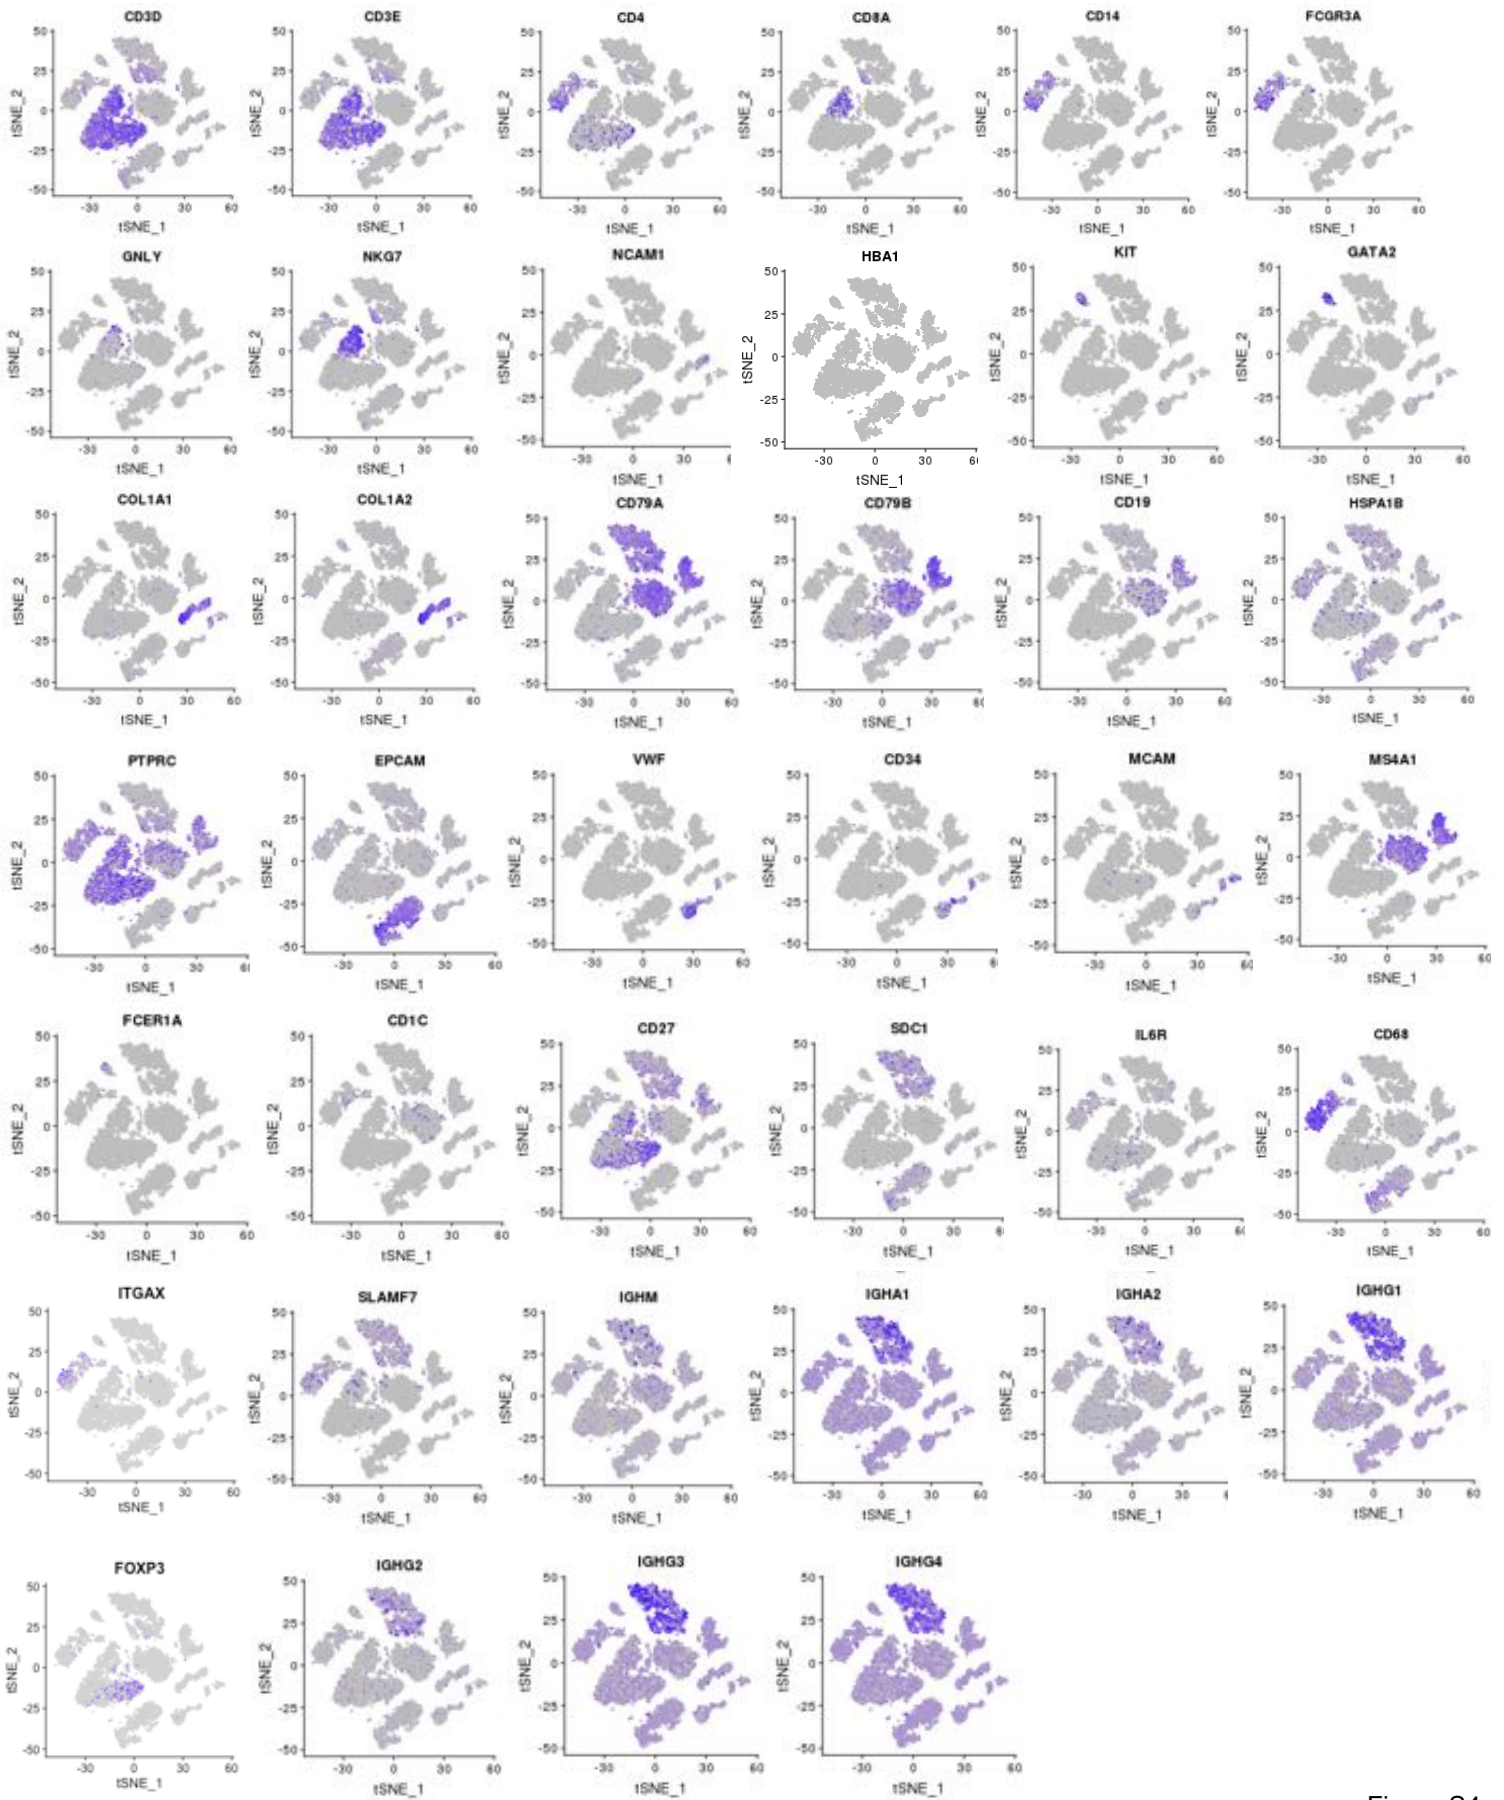

Figure S4
