# Supplementary material for: Potentiality of multiple modalities for single-cell analyses to evaluate the tumor microenvironment in clinical specimens
Source: PubMed Central journal article supplement (PMC7801605; doi:10.1038/s41598-020-79385-w), 2021-01-11
Supplement: 41598_2020_79385_MOESM13_ESM.pdf [file 41598_2020_79385_MOESM13_ESM.pdf]

Sup Table S6. Differentially expressed genes in each Treg clusters in Figure 5b

| Cluster | Gene      | Avg. log FC | Adjusted P-value |
|---------|-----------|-------------|------------------|
| 0       | TIGIT     | 0.71        | 1.50E-64         |
|         | MAGEH1    | 0.95        | 2.50E-61         |
|         | NGFRAP1   | 0.9         | 5.40E-51         |
|         | CARD16    | 0.62        | 6.40E-46         |
|         | CD27      | 0.55        | 1.70E-41         |
|         | CTSC      | 0.58        | 2.10E-36         |
|         | ACP5      | 0.63        | 5.80E-28         |
|         | RTKN2     | 0.57        | 2.00E-26         |
|         | PHLDA1    | 0.54        | 4.50E-23         |
| LAIR2   | 0.56      | 5.00E-23    |                  |
| 1       | CCL20     | 0.68        | 9.40E-41         |
|         | GPX1      | 0.59        | 3.70E-38         |
|         | GPR183    | 0.58        | 1.40E-30         |
| 2       | KLRB1     | 0.67        | 4.80E-30         |
|         | CXCR4     | 0.86        | 7.00E-60         |
|         | KLF2      | 0.98        | 9.80E-59         |
|         | ZFP36L2   | 0.77        | 1.10E-37         |
|         | CCR7      | 0.68        | 3.00E-32         |
|         | CD69      | 0.58        | 3.00E-12         |
| PIK3R1  | 0.51      | 5.80E-07    |                  |
| 3       | IFI44L    | 0.79        | 1.10E-34         |
|         | CCL5      | 1.18        | 1.10E-26         |
|         | STAT1     | 0.62        | 1.10E-25         |
|         | ISG15     | 0.89        | 2.40E-24         |
|         | ALOX5AP   | 0.7         | 8.10E-23         |
|         | IFITM1    | 0.68        | 1.70E-22         |
|         | GIMAP4    | 0.6         | 2.50E-21         |
|         | NT5C3A    | 0.61        | 9.30E-21         |
|         | LY6E      | 0.51        | 4.50E-19         |
| MX1     | 0.67      | 6.00E-19    |                  |
| 4       | TNFRSF4   | 1.58        | 2.80E-92         |
|         | PTP4A3    | 1.13        | 8.10E-75         |
|         | TNFRSF18  | 1.08        | 7.90E-69         |
|         | PKM       | 0.91        | 7.60E-63         |
|         | LINC01588 | 0.71        | 3.10E-53         |
|         | TNFRSF9   | 1.06        | 3.20E-51         |
|         | EBI3      | 0.57        | 5.10E-43         |
|         | MIR155HG  | 0.74        | 1.80E-39         |
|         | SMS       | 0.79        | 2.70E-38         |
| GAPDH   | 0.58      | 3.20E-38    |                  |
| 5       | MKI67     | 1.61        | 7.00E-291        |
|         | GTSE1     | 0.85        | 4.30E-234        |
|         | KIAA0101  | 1.78        | 2.50E-233        |
|         | TOP2A     | 1.43        | 3.40E-233        |
|         | CENPF     | 1.32        | 4.20E-229        |
|         | BIRC5     | 1.06        | 4.40E-227        |
|         | RRM2      | 1.07        | 9.10E-216        |
|         | UBE2C     | 1.53        | 6.70E-214        |
|         | TYMS      | 1.21        | 1.30E-209        |
| CENPW   | 0.92      | 1.70E-206   |                  |
