# Supplementary material for: Potentiality of multiple modalities for single-cell analyses to evaluate the tumor microenvironment in clinical specimens
Source: PubMed Central journal article supplement (PMC7801605; doi:10.1038/s41598-020-79385-w), 2021-01-11
Supplement: 41598_2020_79385_MOESM14_ESM.pdf [file 41598_2020_79385_MOESM14_ESM.pdf]

Sup Table S7, Stats of TIL scRNA-seq

|        | seq_id | Number of Reads | Reads Mapped<br>Confidently to<br>Transcriptome | Reads mapped<br>confidently to intronic<br>regions | Sequencing<br>Saturation | Q30 bases in<br>RNA read | number of cell after cut-off |
|--------|--------|-----------------|-------------------------------------------------|----------------------------------------------------|--------------------------|--------------------------|------------------------------|
| gc_003 | s_026  | 131,001,192     | 61.60%                                          | 21.70%                                             | 64.30%                   | 91.10%                   | 2,898                        |
|        | s_034  | 129,466,618     | 68.70%                                          | 16.80%                                             | 61.20%                   | 92.30%                   |                              |
| gc_005 | s_035  | 154,833,380     | 68.00%                                          | 17.40%                                             | 67.80%                   | 90.80%                   | 11,714                       |
|        | s_036  | 148,789,195     | 68.40%                                          | 16.70%                                             | 63.70%                   | 89.80%                   |                              |
|        | s_037  | 147,603,781     | 68.20%                                          | 16.70%                                             | 59.90%                   | 89.30%                   |                              |
|        | s_041  | 168,686,343     | 68.20%                                          | 14.40%                                             | 44.00%                   | 85.50%                   |                              |
| gc007  | s_042  | 179,117,453     | 67.40%                                          | 14.70%                                             | 49.20%                   | 86.30%                   | 7,462                        |
|        | s_043  | 176,846,453     | 69.60%                                          | 13.50%                                             | 45.80%                   | 84.70%                   |                              |
|        | s_044  | 147,769,576     | 69.50%                                          | 14.30%                                             | 40.00%                   | 91.20%                   |                              |
|        | s_063  | 141,031,550     | 63.10%                                          | 19.90%                                             | 72.40%                   | 79.60%                   |                              |
| gc_009 | s_064  | 127,884,737     | 62.70%                                          | 20.40%                                             | 75.60%                   | 83.20%                   | 10,858                       |
|        | s_065  | 157,390,174     | 65.00%                                          | 19.80%                                             | 67.70%                   | 86.70%                   |                              |
|        | s_066  | 144,745,148     | 63.50%                                          | 20.40%                                             | 64.30%                   | 89.30%                   |                              |
|        | s_071  | 141,020,433     | 54.90%                                          | 30.20%                                             | 79.50%                   | 83.70%                   |                              |
| gc_010 | s_072  | 149,289,108     | 56.90%                                          | 28.60%                                             | 81.20%                   | 84.20%                   | 11,711                       |
|        | s_073  | 180,116,854     | 53.90%                                          | 27.30%                                             | 83.50%                   | 77.60%                   |                              |
|        | s_074  | 54,683,950      | 56.80%                                          | 27.50%                                             | 60.60%                   | 89.40%                   |                              |
